# Supplementary material
Source: publisher figshare collection journal article supplement (https://gsapubs.figshare.com/articles/dataset/_/12528284)

# Appendix 6D1 - Row Normalized Data

## Atlantic Ocean

41001

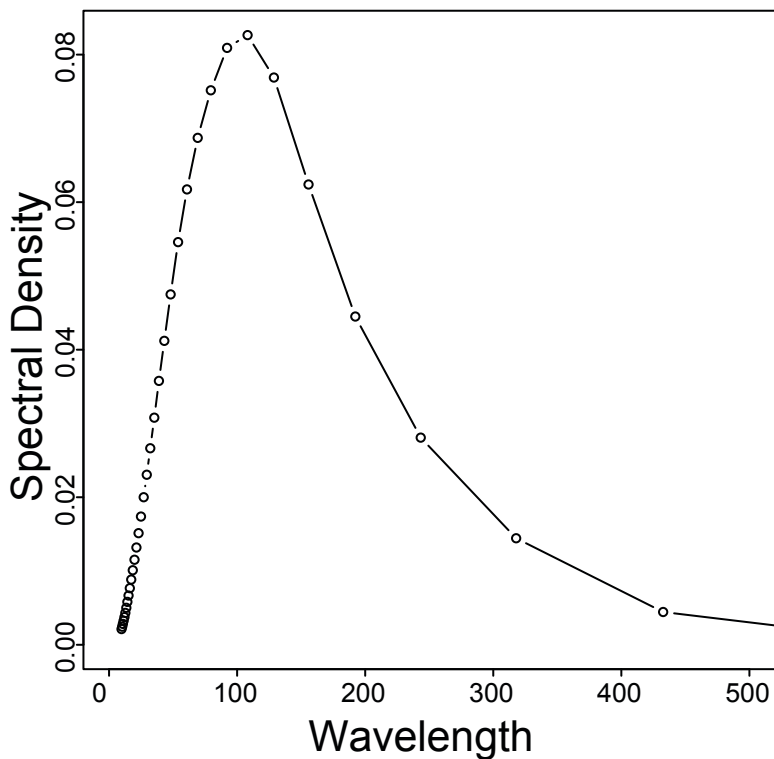

41012

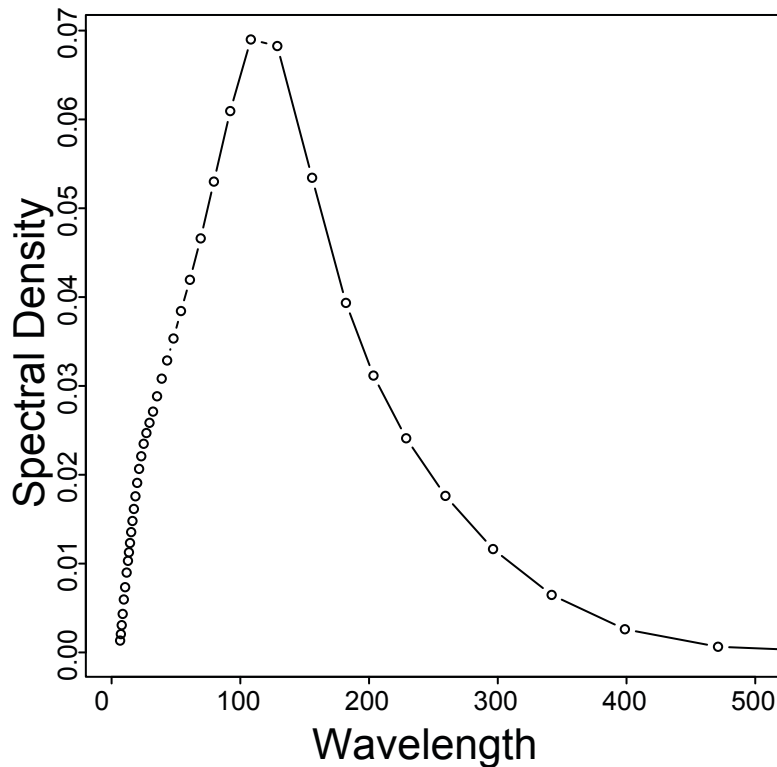

41025

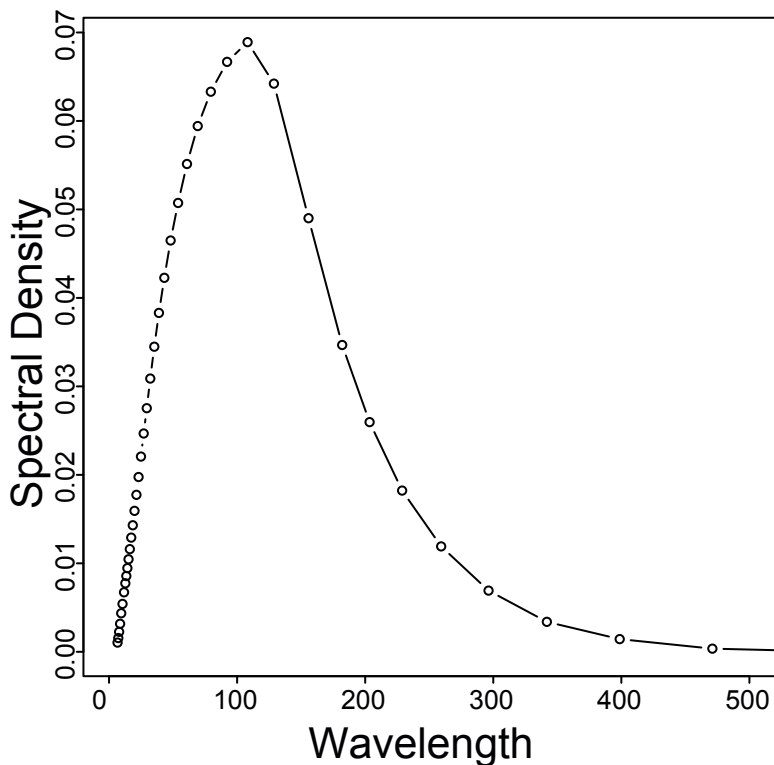

41035

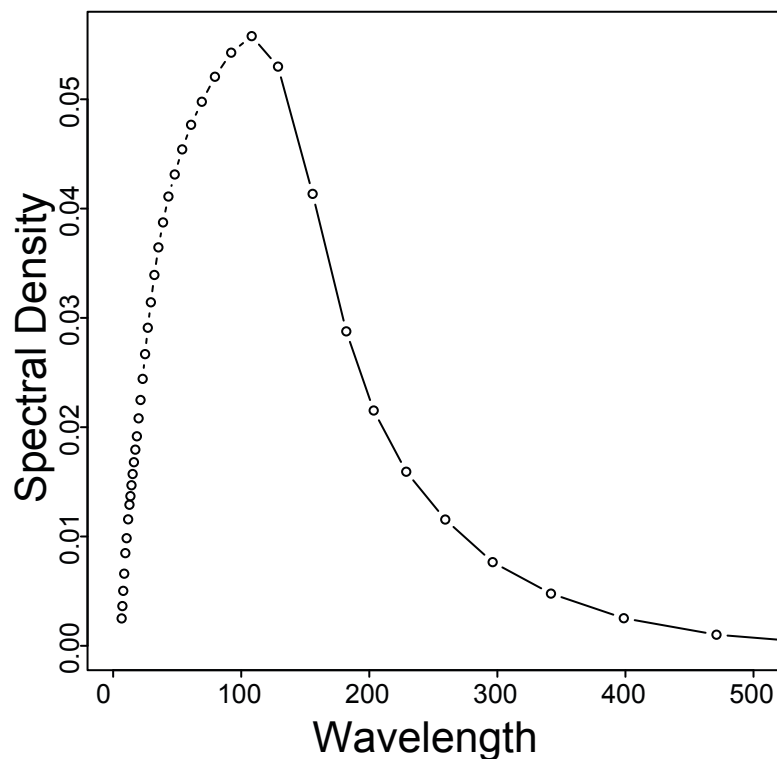

# Appendix 6D1 - Row Normalized Data

## Atlantic Ocean

41036

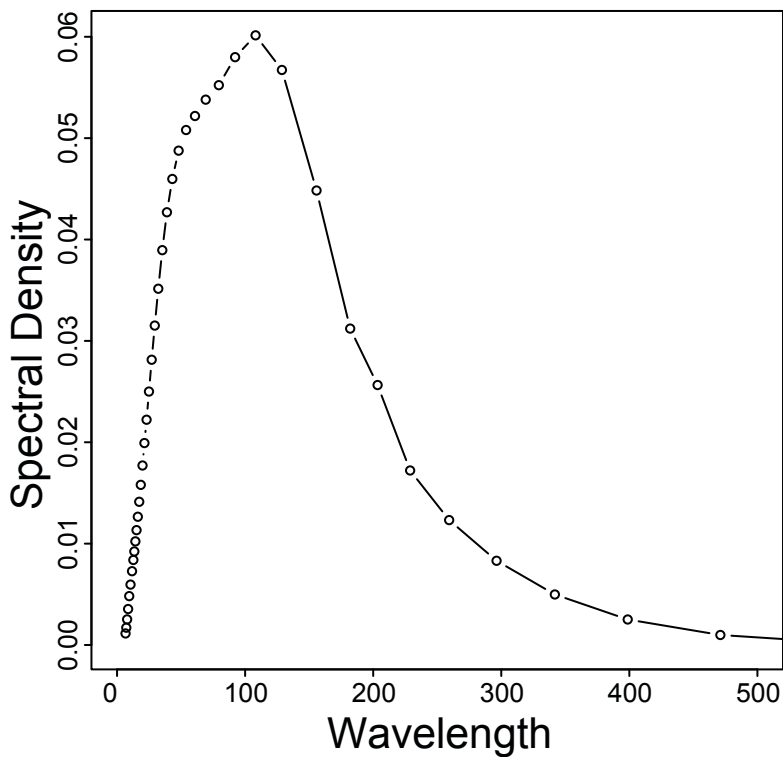

41047

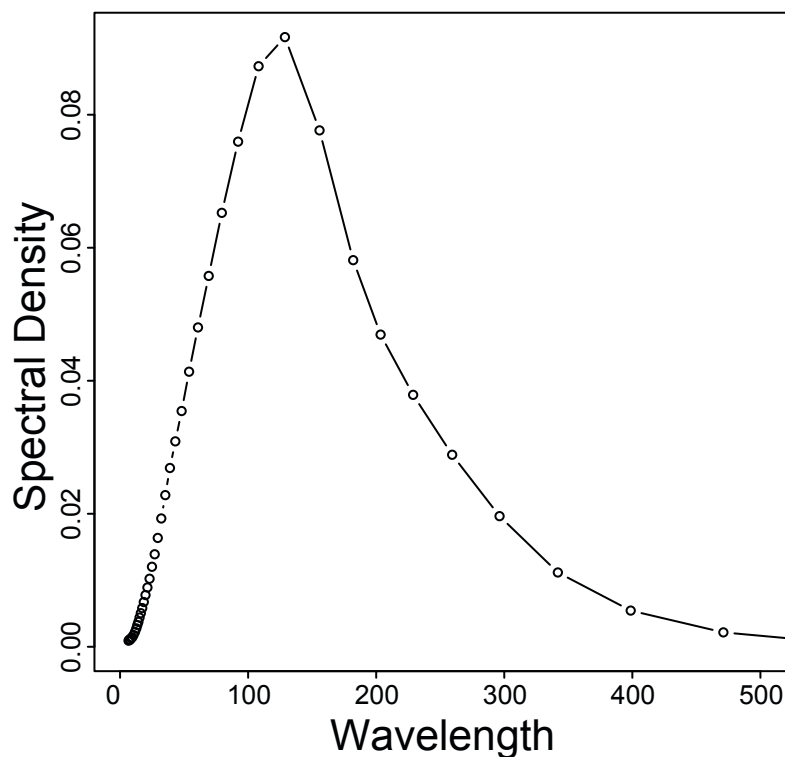

41048

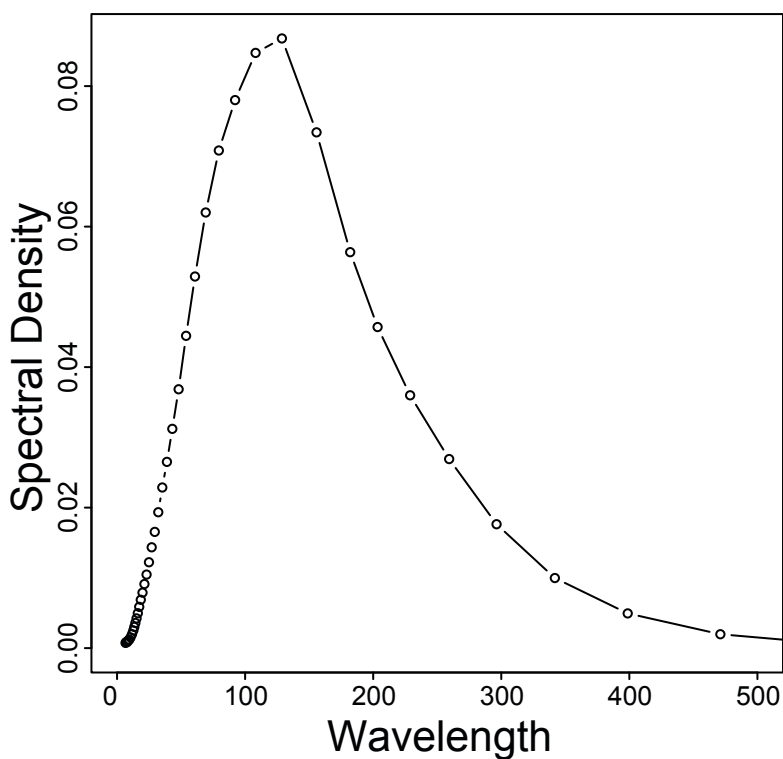

44005

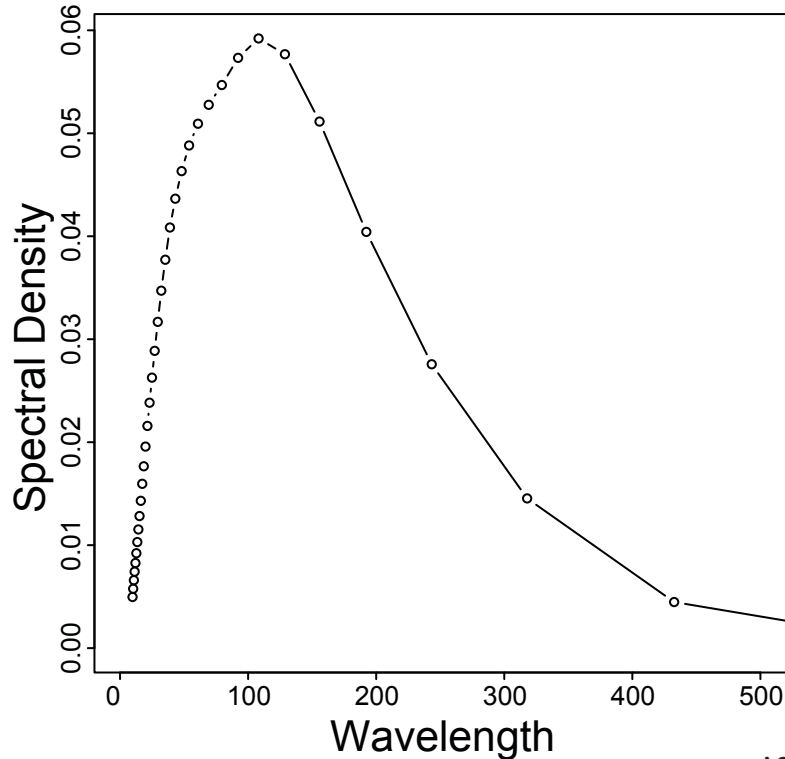

# Appendix 6D1 - Row Normalized Data

## Atlantic Ocean

44013

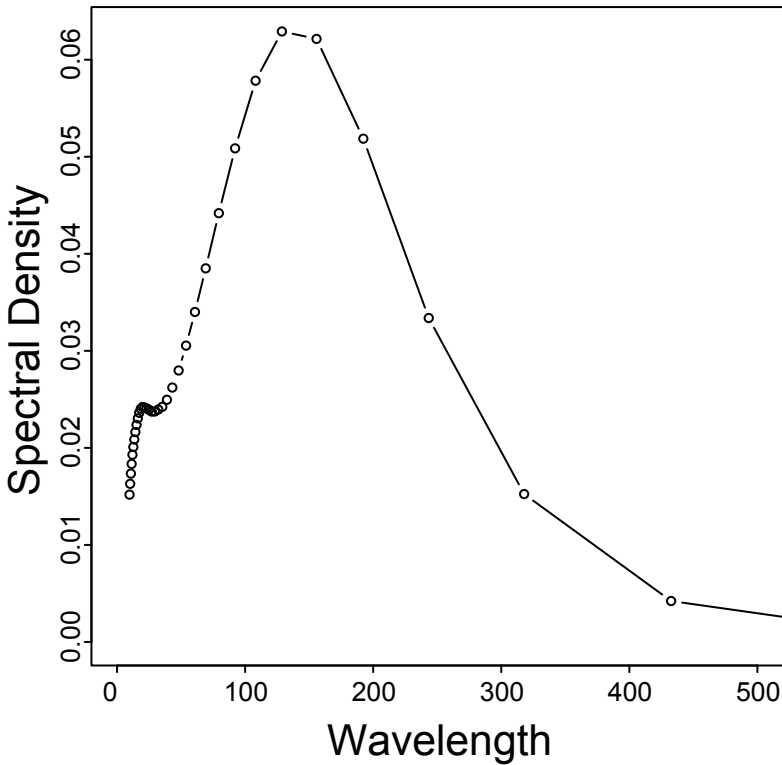

44017

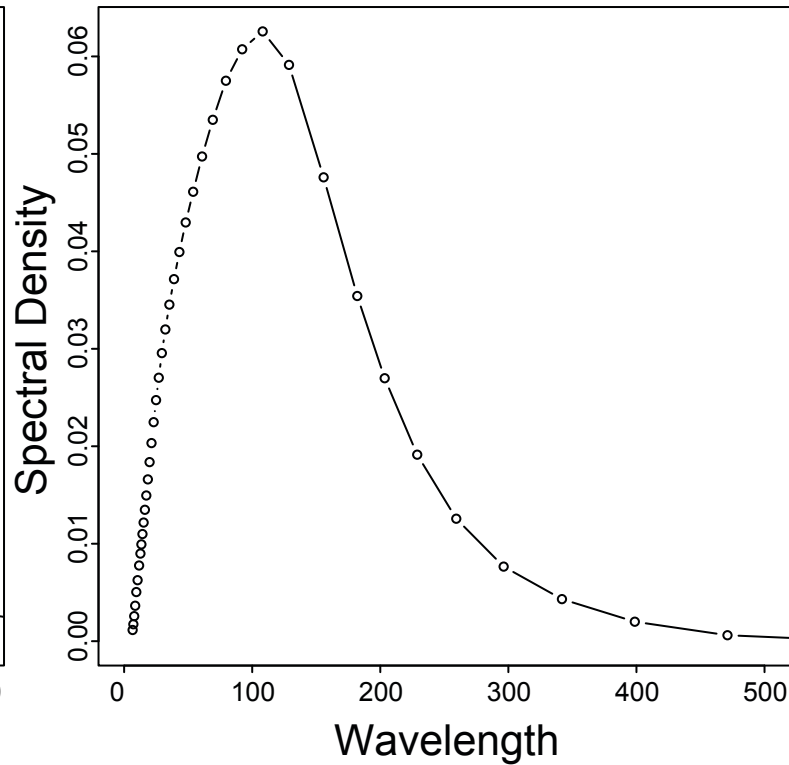

44018

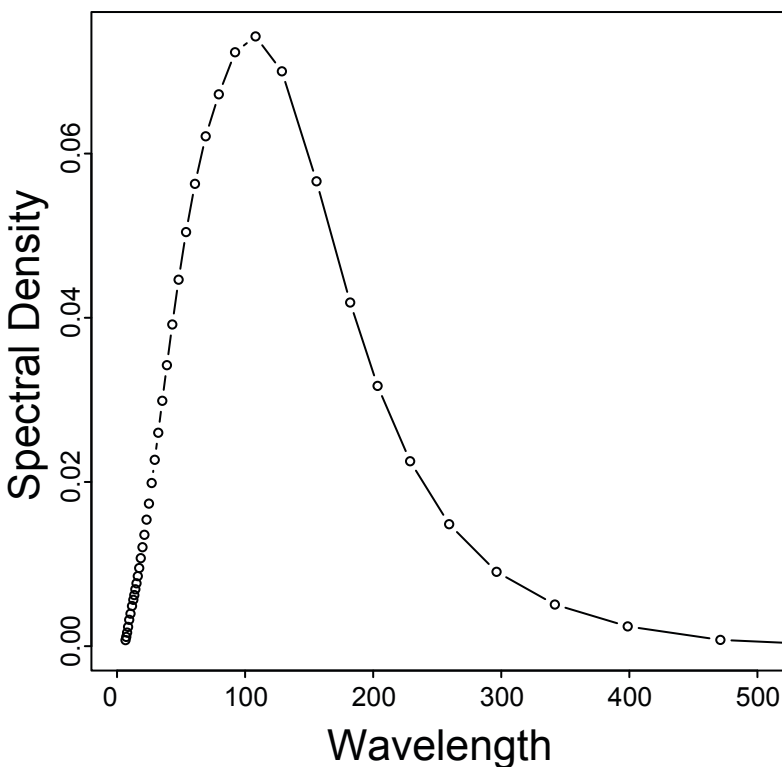

44025

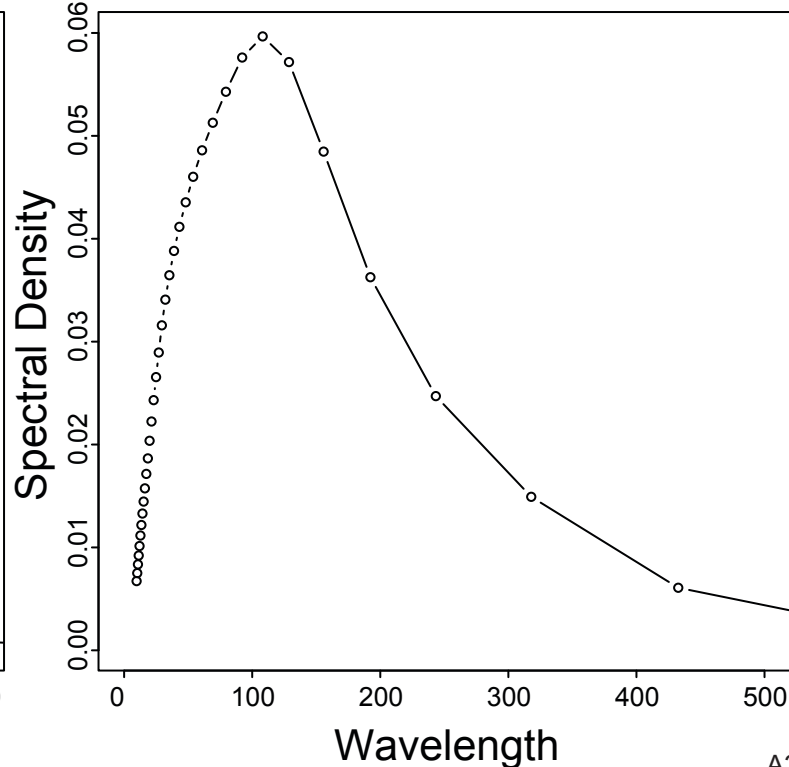

# Appendix 6D1 - Row Normalized Data Atlantic Ocean

44027

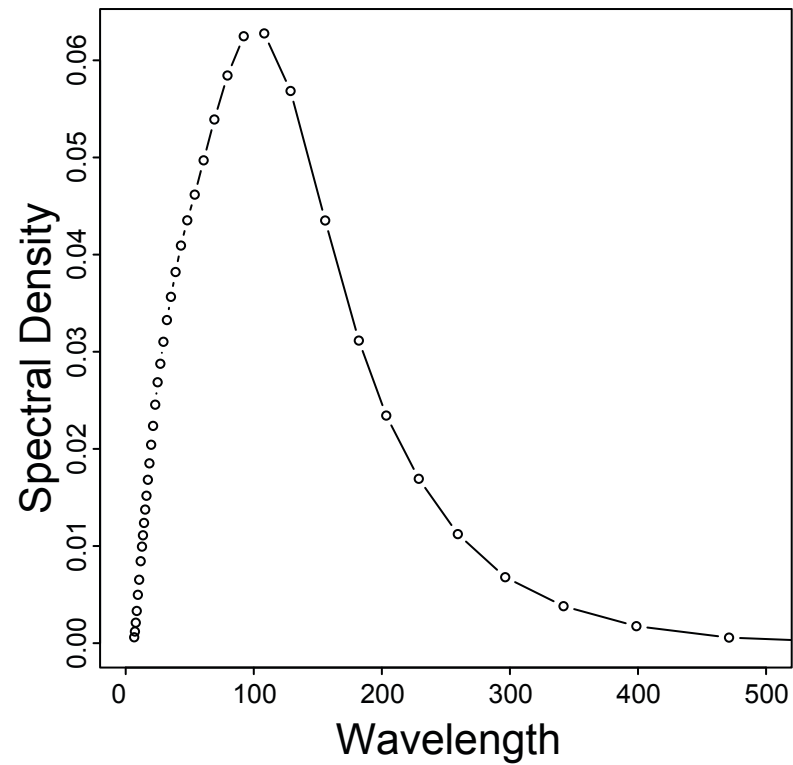



# Appendix 6D1 - Row Normalized Data

## Caribbean Sea

41040

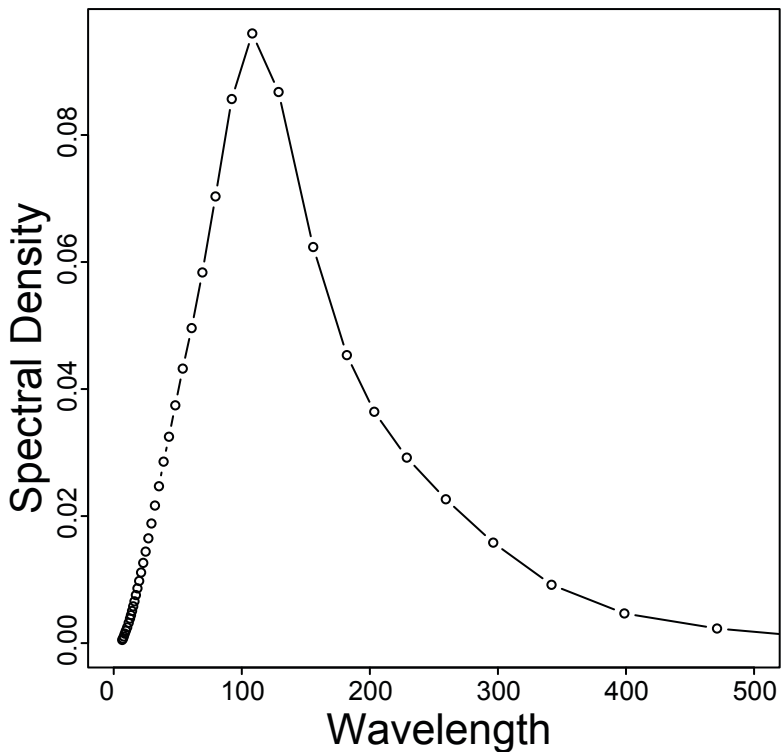

41041

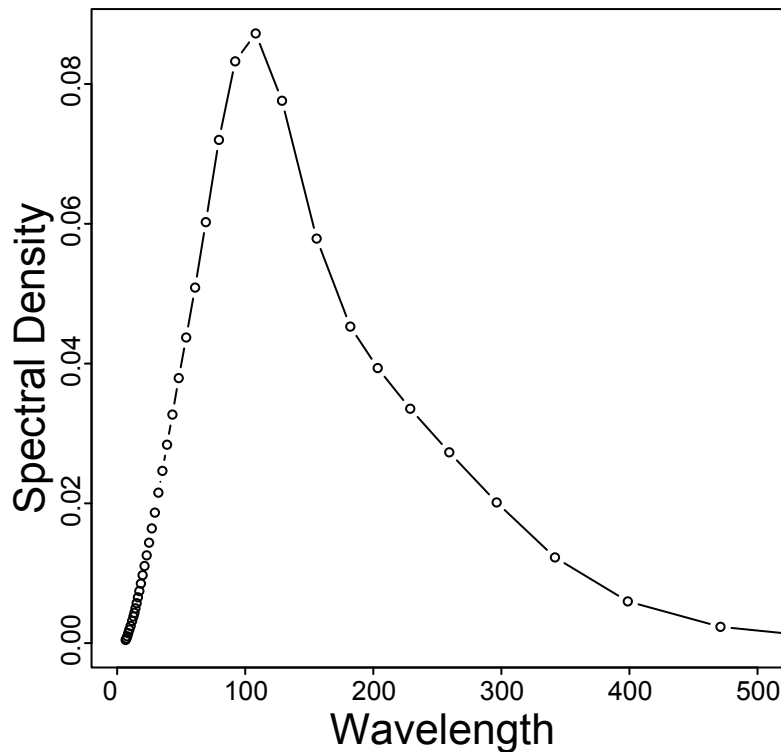

41043

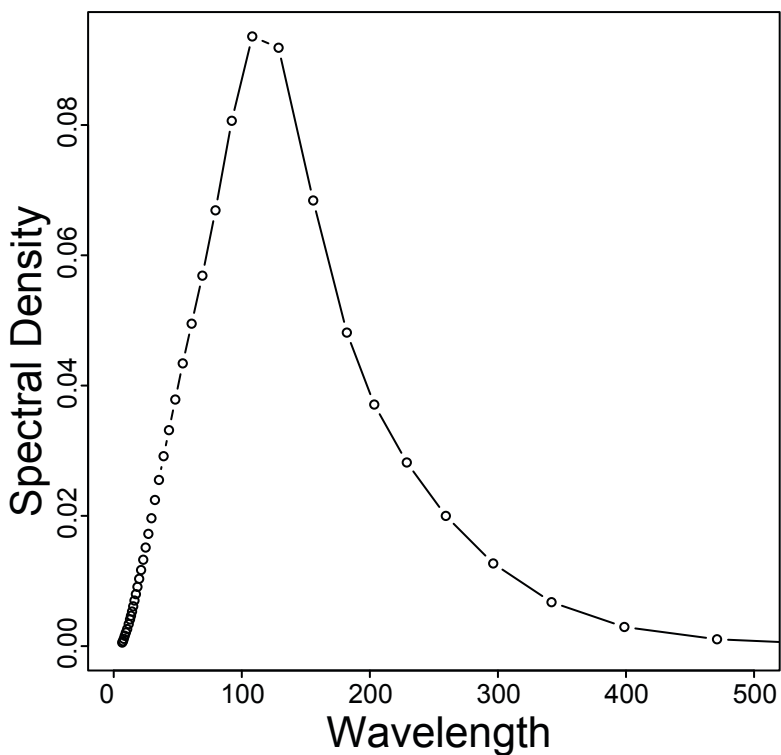

41046

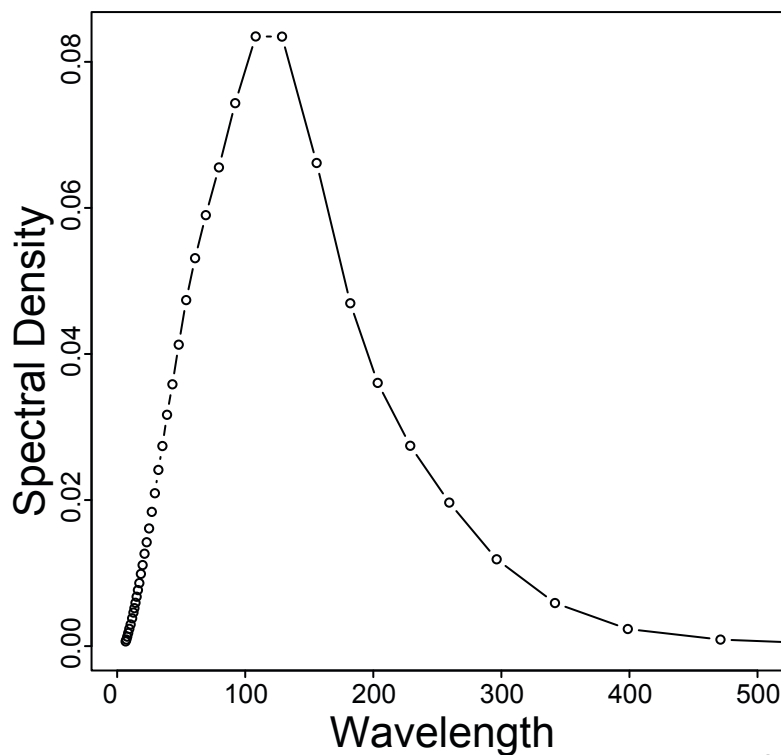

# Appendix 6D1 - Row Normalized Data

## Caribbean Sea

42056

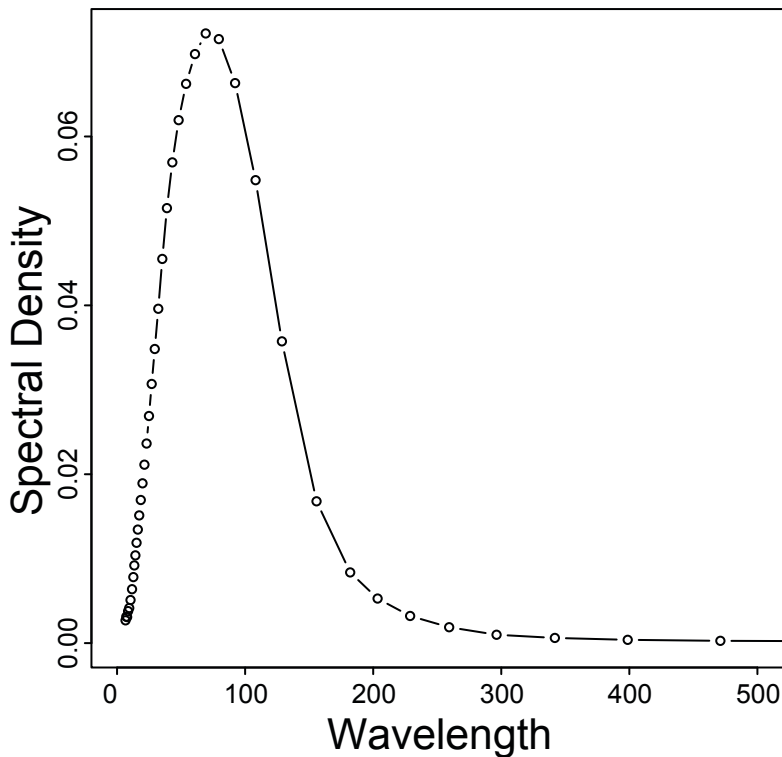

42057

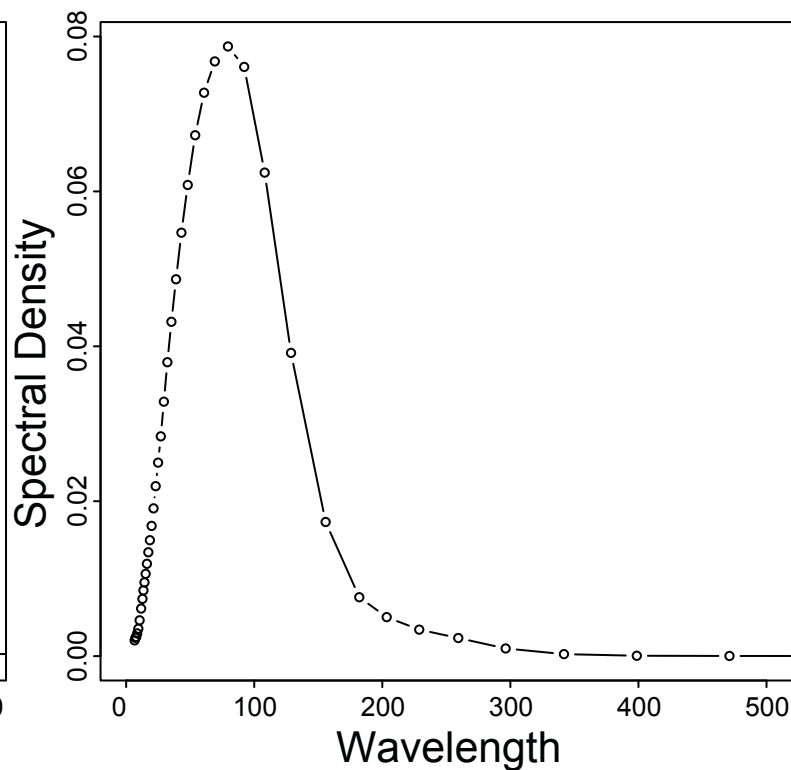

42058

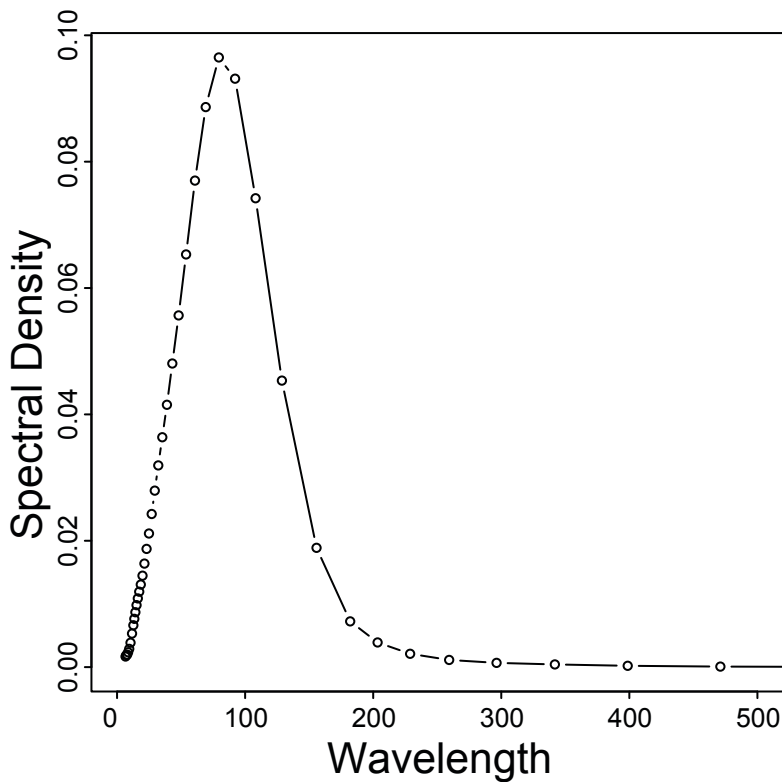

42059

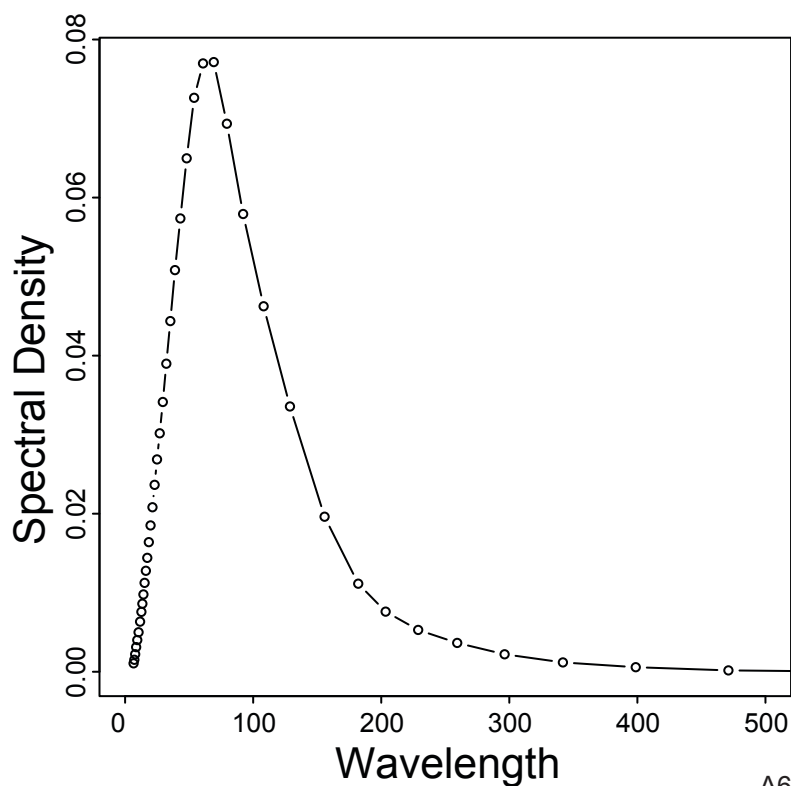

# Appendix 6D1 - Row Normalized Data

## Gulf Of Mexico

42001

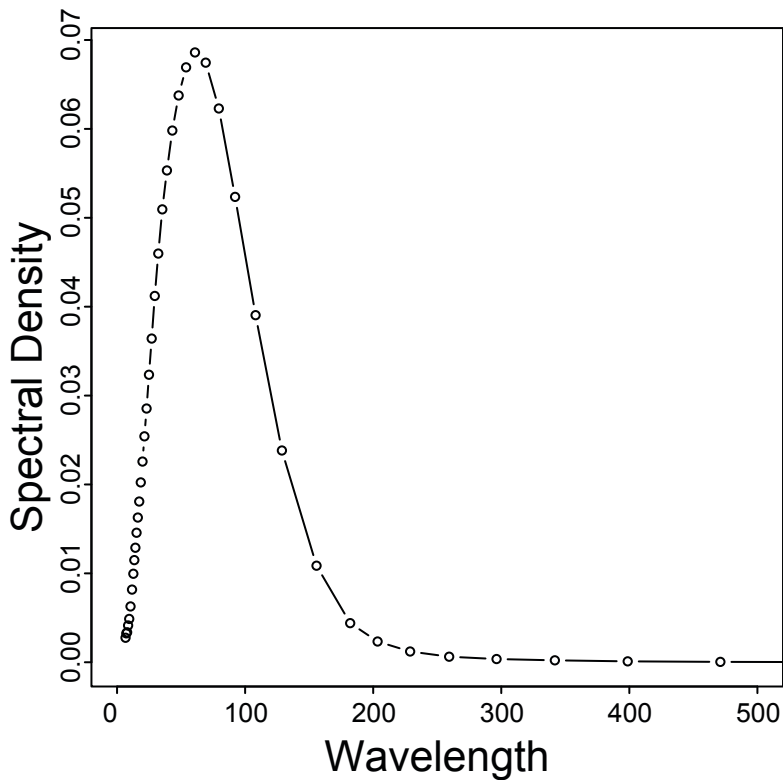

42002

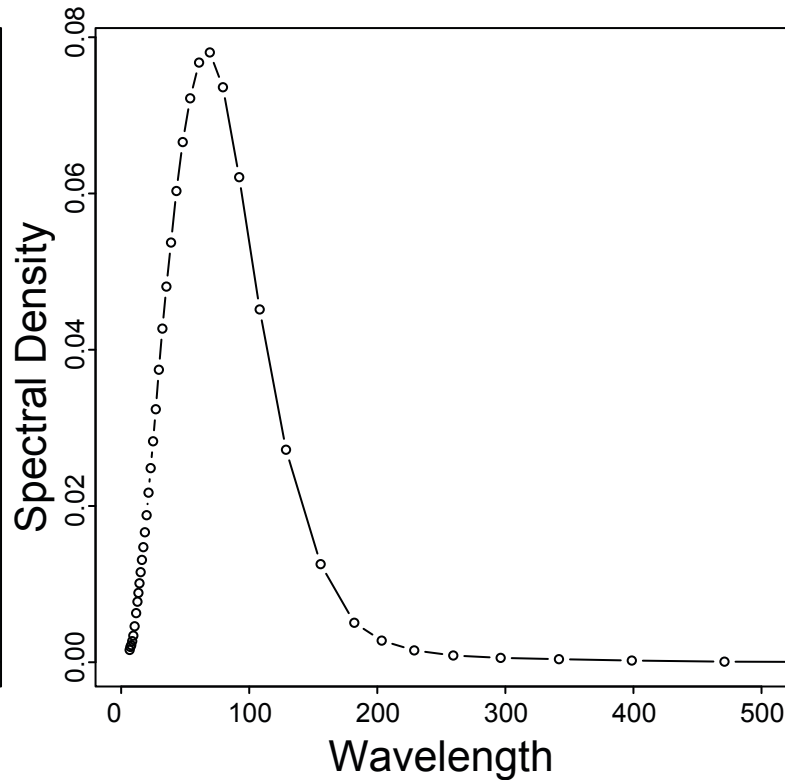

42003

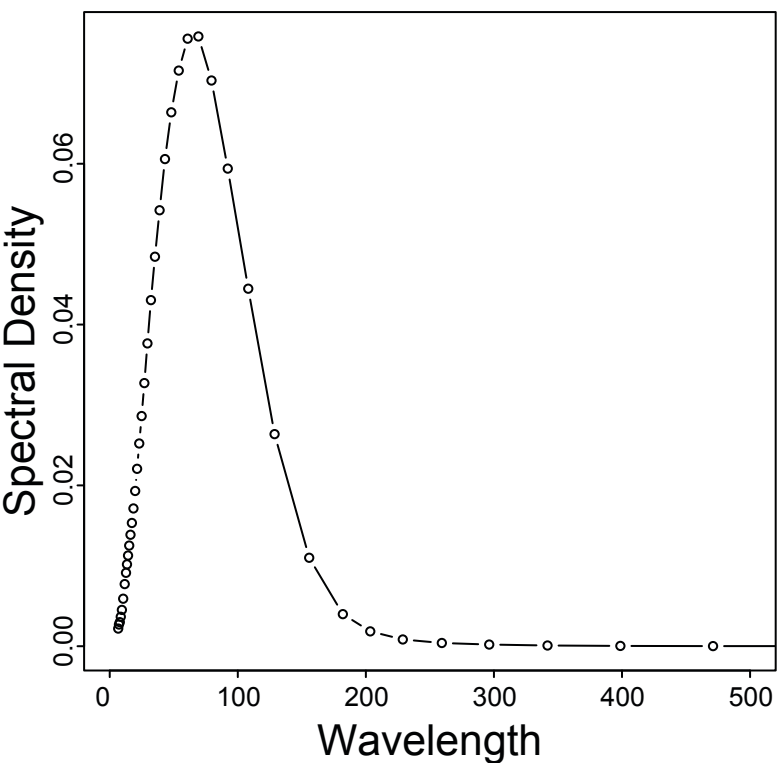

42007

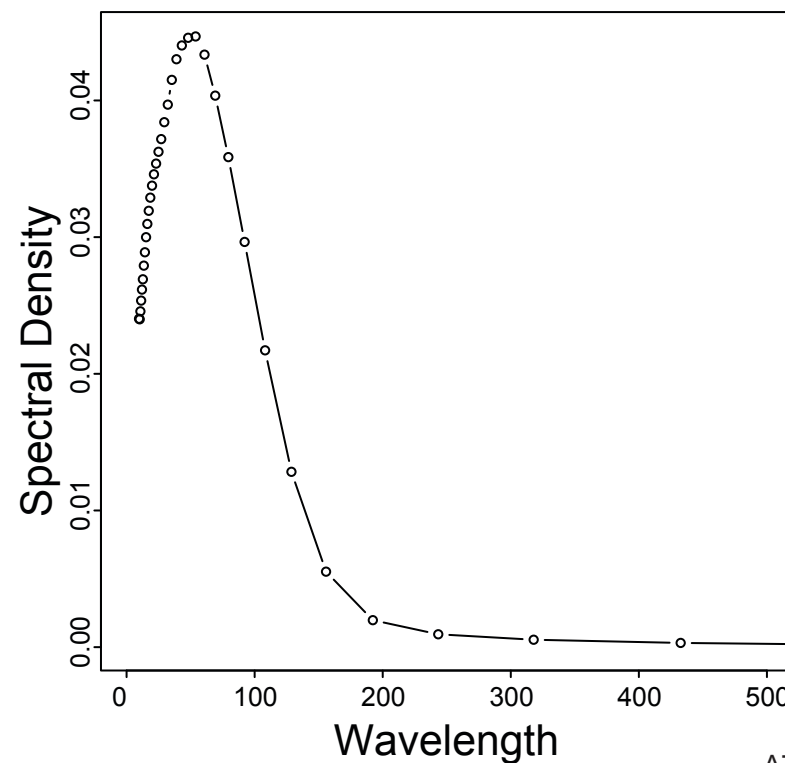

# Appendix 6D1 - Row Normalized Data

## Gulf Of Mexico

42019

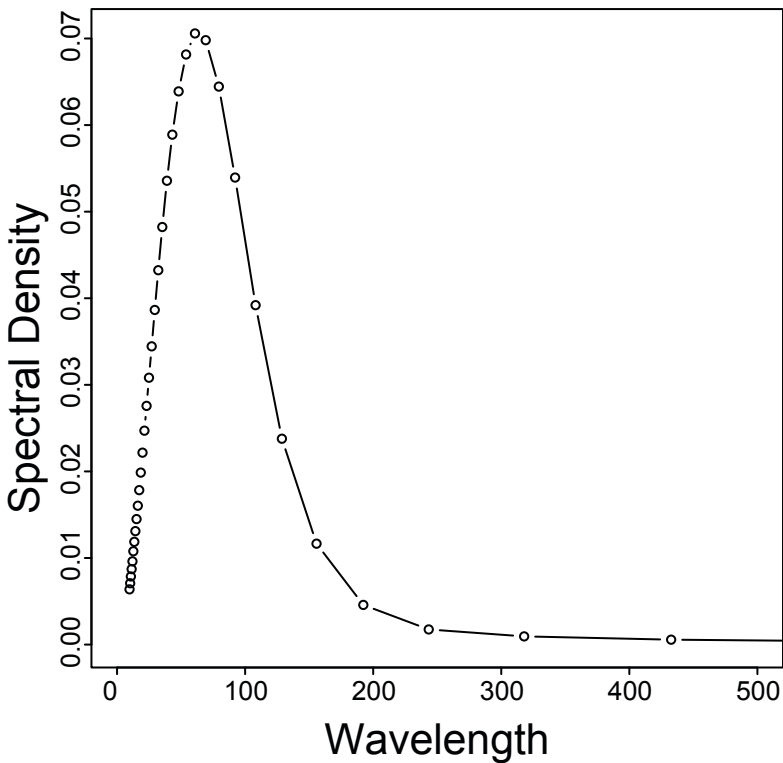

42020

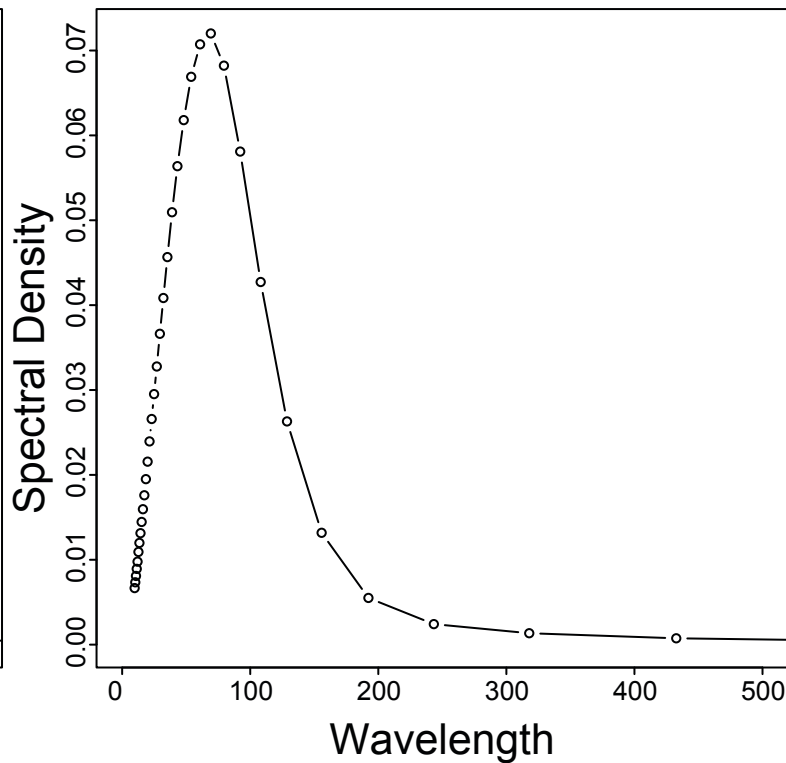

42035

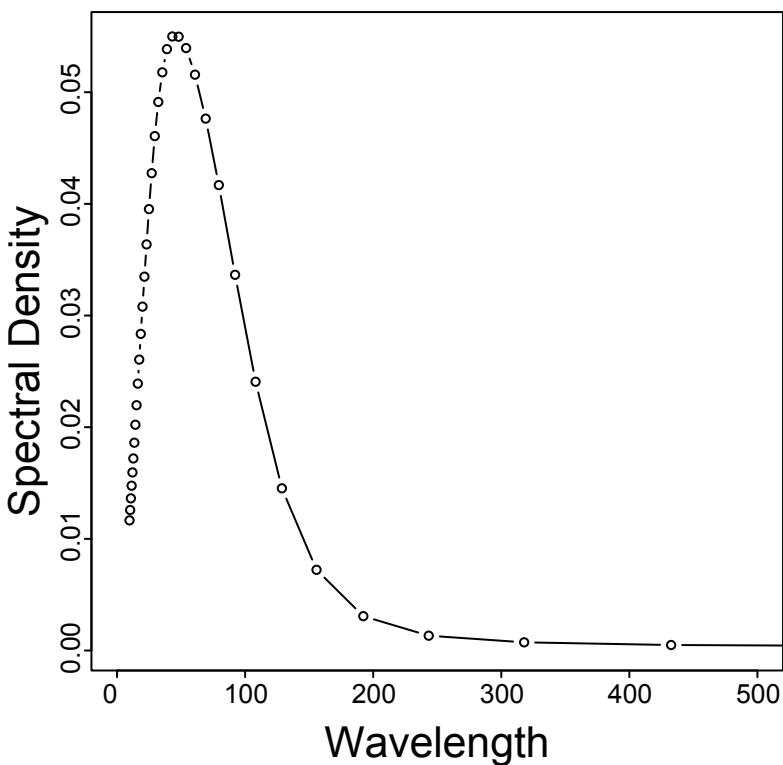

42036

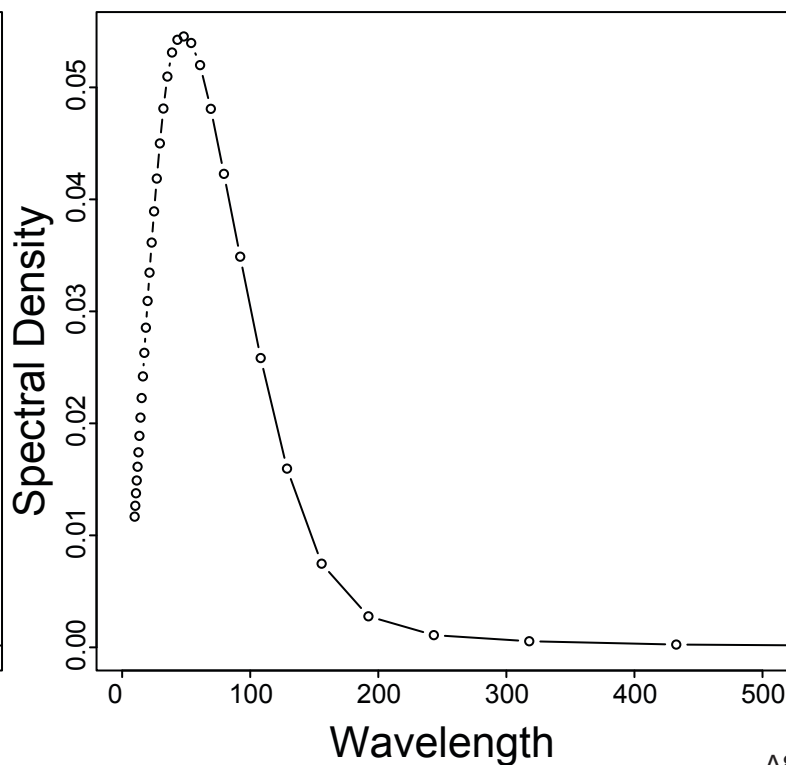

# Appendix 6D1 - Row Normalized Data

## Gulf Of Mexico

42039

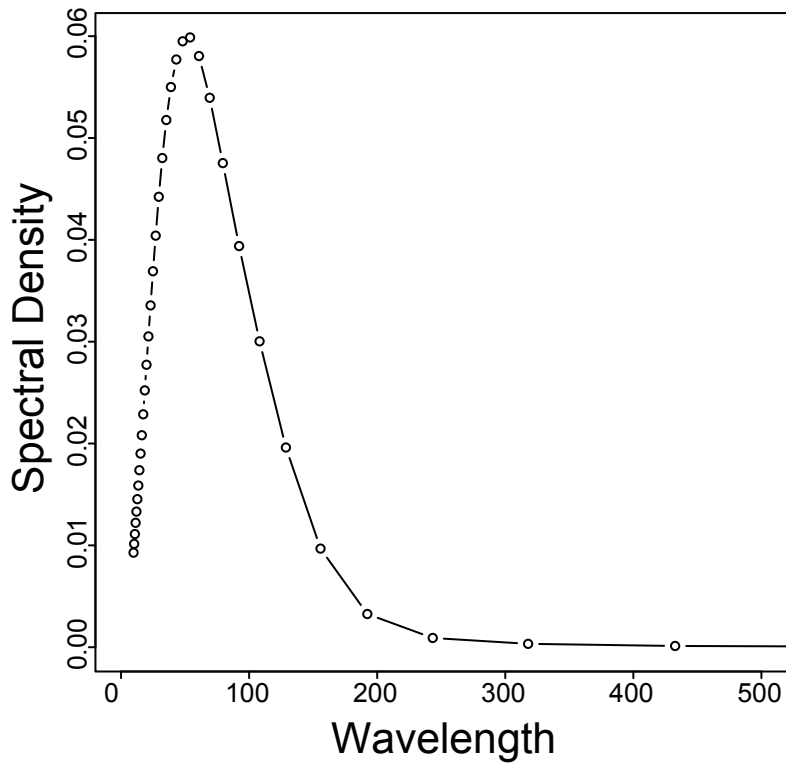

42040

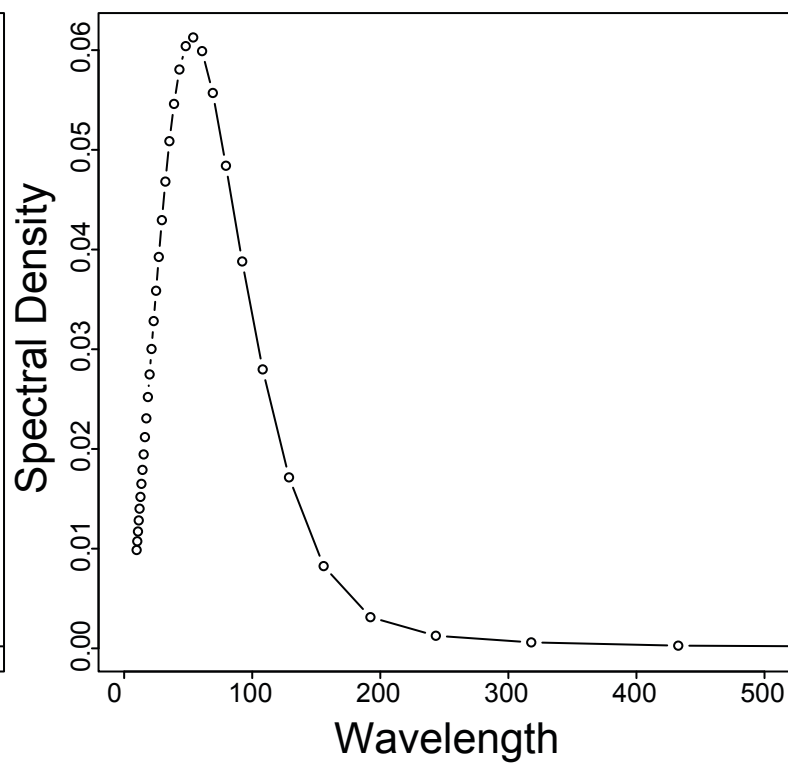

42055

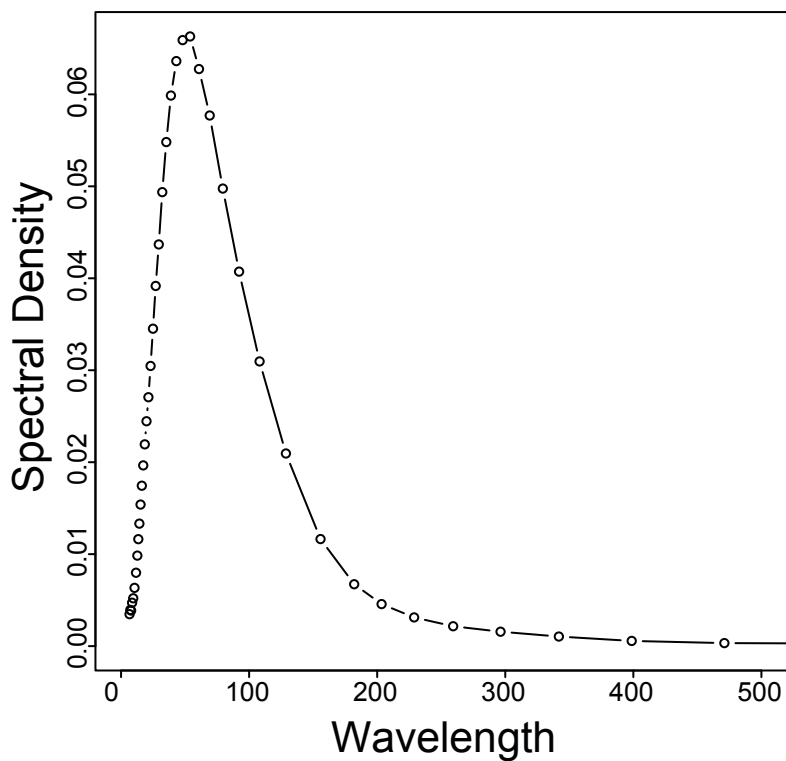

**Supplementary Figure 8 F 1 Buoy 42040**

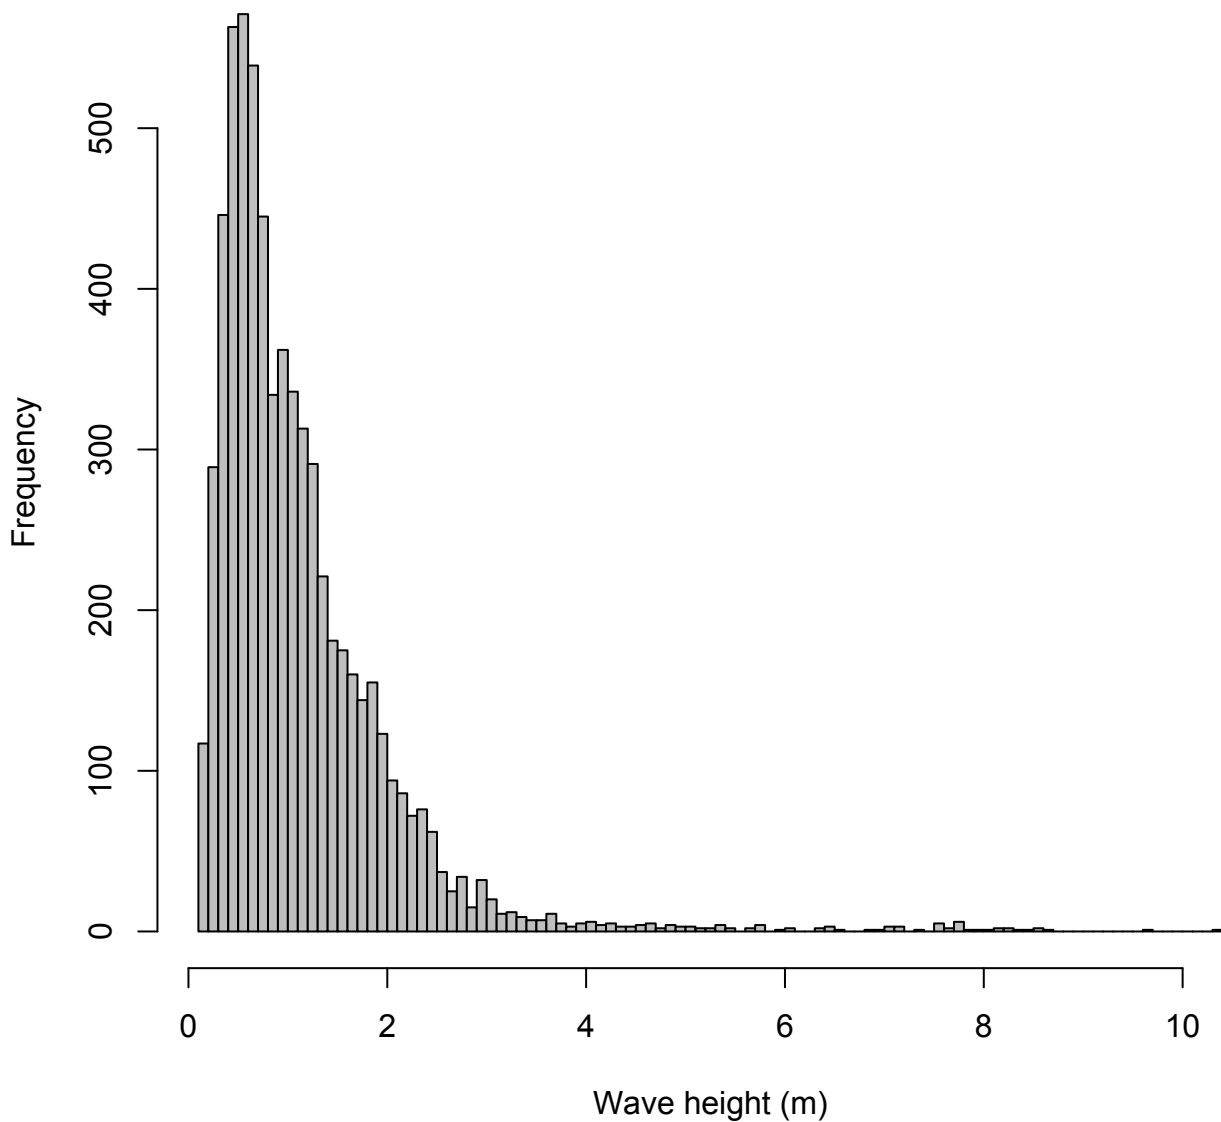

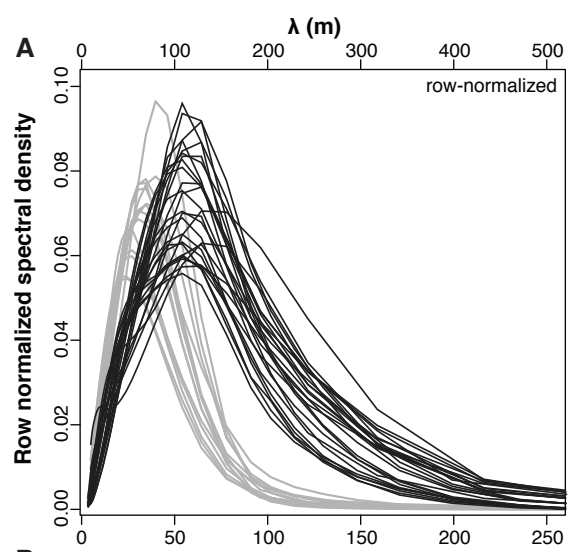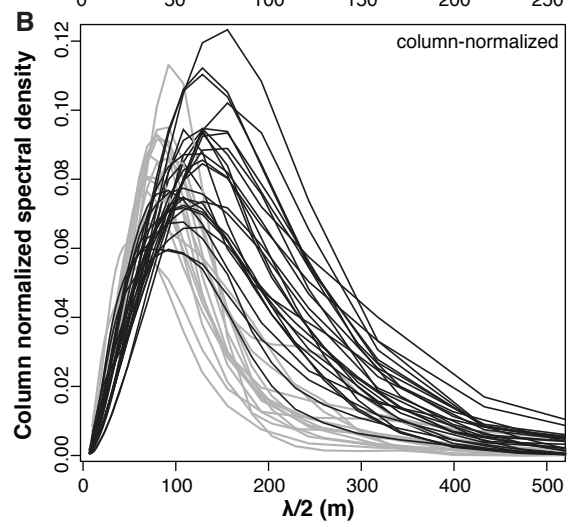

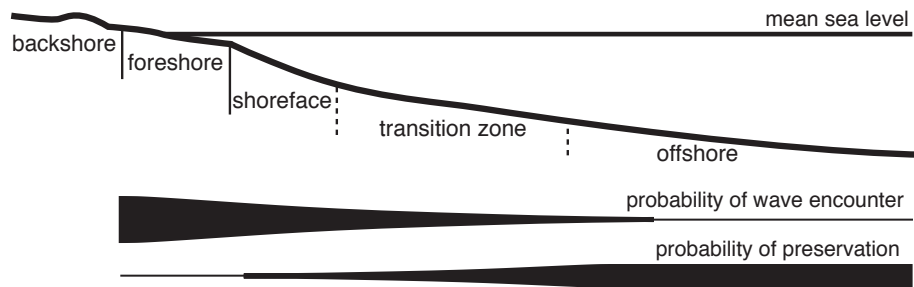

### oscillatory flow conditions

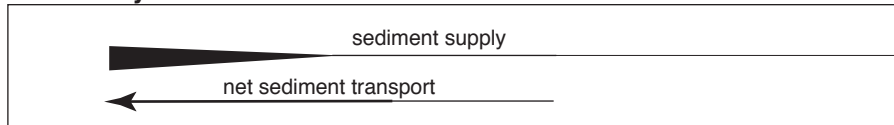

### oscillatory-combined flow conditions

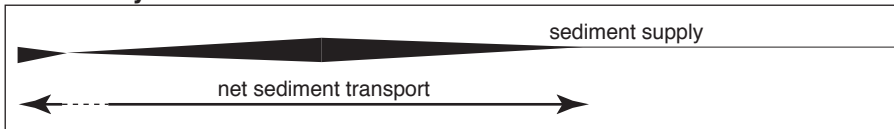

Supplement: Supplementary file 1 [file 1]
